# Supplementary material for: A theoretical search for stable bent and linear structures of low-lying electronic states of the titanium dioxide (TiO2) molecule
Source: Royal Society of Chemistry journal article supplement (doi:10.1039/c1ra00478f), 2011-01-01
Supplement: c1ra00478f.pdf [file c1ra00478f.pdf]

# A theoretical search for stable bent and linear structures of low-lying electronic states of titanium dioxide (TiO<sub>2</sub>) molecule

Chih-Kai Lin,<sup>\*a,b</sup> Jun Li,<sup>c</sup> Zheyuan Tu,<sup>d</sup> Xiangyuan Li,<sup>c</sup> Michitoshi Hayashi<sup>e</sup> and Sheng Hsien Lin<sup>a,b</sup>

<sup>a</sup> Institute of Atomic and Molecular Sciences, Academia Sinica, Taipei, Taiwan 10617, ROC. E-mail: ethene@gate.sinica.edu.tw

<sup>b</sup> Department of Applied Chemistry, National Chiao Tung University, Hsinchu, Taiwan 30010, ROC.

<sup>c</sup> College of Chemical Engineering, Sichuan University, Chengdu 61005, P. R. China. E-mail: xyli@scu.edu.cn

<sup>d</sup> College of Chemistry, Sichuan University, Chengdu 61005, P. R. China. E-mail: tuzheyuan@gmail.com

<sup>e</sup> Center for Condensed Matter Sciences, National Taiwan University, Taipei, Taiwan 10617, ROC.

## Supplementary Information

**Table S1** Calculated equilibrium geometry and vibrational frequencies of the ground state ( $S_0$   $1^1A_1$ ) of TiO<sub>2</sub> with comparison of different basis sets.

| Level of theory    | Basis set            | Equilibrium geometry          |                                 | Vibrational frequencies        |                                |                                | Dipole moment        |
|--------------------|----------------------|-------------------------------|---------------------------------|--------------------------------|--------------------------------|--------------------------------|----------------------|
|                    |                      | $r_{\text{TiO}} / \text{\AA}$ | $\theta_{\text{OTiO}} / ^\circ$ | $\nu_1 (a_1) / \text{cm}^{-1}$ | $\nu_2 (a_1) / \text{cm}^{-1}$ | $\nu_3 (b_2) / \text{cm}^{-1}$ | $\mu / \text{debye}$ |
| CASSCF(12,12)      | aug-cc-pVTZ          | 1.654                         | 112.6                           | 1005.8                         | 329.6                          | 945.1                          | 6.92                 |
|                    | MBS-ECP <sup>a</sup> | 1.660                         | 114.2                           | 1002.2                         | 316.9                          | 996.3                          | 6.66                 |
| CASSCF(16,14)      | aug-cc-pVTZ          | 1.648                         | 113.2                           | 1021.8                         | 326.5                          | 940.0                          | 6.98                 |
|                    | MBS-ECP              | 1.654                         | 115.2                           | 1017.6                         | 310.6                          | 1005.0                         | 6.68                 |
| CASPT2(12,12)      | aug-cc-pVTZ          | 1.672                         | 111.3                           | 924.4                          | 328.0                          | 926.5                          | 6.97                 |
|                    | MBS-ECP              | 1.682                         | 114.4                           | –                              | –                              | –                              | 6.66                 |
| Expt. <sup>b</sup> |                      | 1.651                         | 111.6                           | 946.9                          | 330 ± 6                        | 917.1                          | 6.33                 |

<sup>a</sup> The effective core potential developed by the Los Alamos group (ref. S1) and built in the *MOLPRO 2006* program.

<sup>b</sup> Ref. S2, S3 and S4.

**Table S2** Calculated properties of the linear structure of the ground state ( $1^1\Sigma_g^+$ ) of  $\text{TiO}_2$  with comparison of different basis sets.

| Level of theory | Basis set            | Adiabatic energy <sup>a</sup>      | Equilibrium geometry        |                                 | Vibrational frequencies               |                                  |                                       |
|-----------------|----------------------|------------------------------------|-----------------------------|---------------------------------|---------------------------------------|----------------------------------|---------------------------------------|
|                 |                      | $\Delta E_{\text{ad}} / \text{eV}$ | $r_{\text{TiO}} / \text{Å}$ | $\theta_{\text{OTiO}} / ^\circ$ | $\nu_1 (\sigma_g^+) / \text{cm}^{-1}$ | $\nu_2 (\pi_u) / \text{cm}^{-1}$ | $\nu_3 (\sigma_g^-) / \text{cm}^{-1}$ |
| CASSCF(12,12)   | aug-cc-pVTZ          | 1.507                              | 1.722                       | 180.0                           | 881.6                                 | (340i)                           | 719.4                                 |
|                 | MBS-ECP <sup>b</sup> | 1.286                              | 1.713                       | 180.0                           | 911.1                                 | (332i)                           | 859.3                                 |
| CASSCF(16,14)   | aug-cc-pVTZ          | 1.419                              | 1.713                       | 180.0                           | –                                     | –                                | –                                     |
|                 | MBS-ECP              | 1.219                              | 1.705                       | 180.0                           | –                                     | –                                | –                                     |

<sup>a</sup> With respect to the ground state equilibrium calculated at the same level of theory and basis set; without zero-point energy.

<sup>b</sup> The effective core potential developed by the Los Alamos group (ref. S1) and built in the *MOLPRO* 2006 program.

**Table S3** Calculated oscillator strengths upon excitations from the ground state to low-lying singlet excited states of  $\text{TiO}_2$ .<sup>a</sup>

| State    | Excitation <sup>b</sup> | TD-B3LYP | TD-HSE06 | TD- $\omega$ B97X-D | TD-CAM-B3LYP | EOM-CCSD | CASSCF(16,14) | MRCI <sup>b</sup> |
|----------|-------------------------|----------|----------|---------------------|--------------|----------|---------------|-------------------|
| $1^1B_2$ | $6b_2-10a_1$            | 0.0062   | 0.0070   | 0.0049              | 0.0058       | 0.0077   | 0.0035        | 0.014             |
| $1^1A_2$ | $6b_2-4b_1$             | 0.0000   | 0.0000   | 0.0000              | 0.0000       | 0.0000   | 0.0000        | 0.0000            |
| $2^1B_2$ | $6b_2-11a_1$            | 0.0040   | 0.0045   | 0.0103              | 0.0055       | 0.0080   | 0.0014        | 0.010             |
| $2^1A_1$ | $9a_1-10,11a_1$         | 0.0017   | 0.0014   | 0.0000              | 0.0002       | 0.0004   | 0.0029        | 0.0003            |
| $1^1B_1$ | $3b_1-10,11a_1$         | 0.0153   | 0.0195   | 0.0286              | 0.0219       | 0.0209   | 0.0049        | 0.041             |
| $2^1B_1$ | $9a_1-4b_1$             | 0.0001   | 0.0000   | 0.0031              | 0.0003       | 0.0013   | 0.0004        | 0.0007            |
| $2^1A_2$ | $1a_2-10,11a_1$         | 0.0000   | 0.0000   | 0.0000              | 0.0000       | 0.0000   | 0.0000        | 0.0000            |
| $3^1A_1$ | $9a_1-11a_1$            | 0.0040   | 0.0045   | 0.0032              | 0.0036       | 0.0044   | 0.0057        | 0.013             |
| $3^1B_2$ | $5b_2-10,11a_1$         | 0.0014   | 0.0057   | 0.0045              | 0.0028       | 0.0013   | 0.0022        | 0.008             |

<sup>a</sup> The excitation energies are shown in **Table 3** in the main text.

<sup>b</sup> Major excitation configurations and MRCI data from ref. S5.

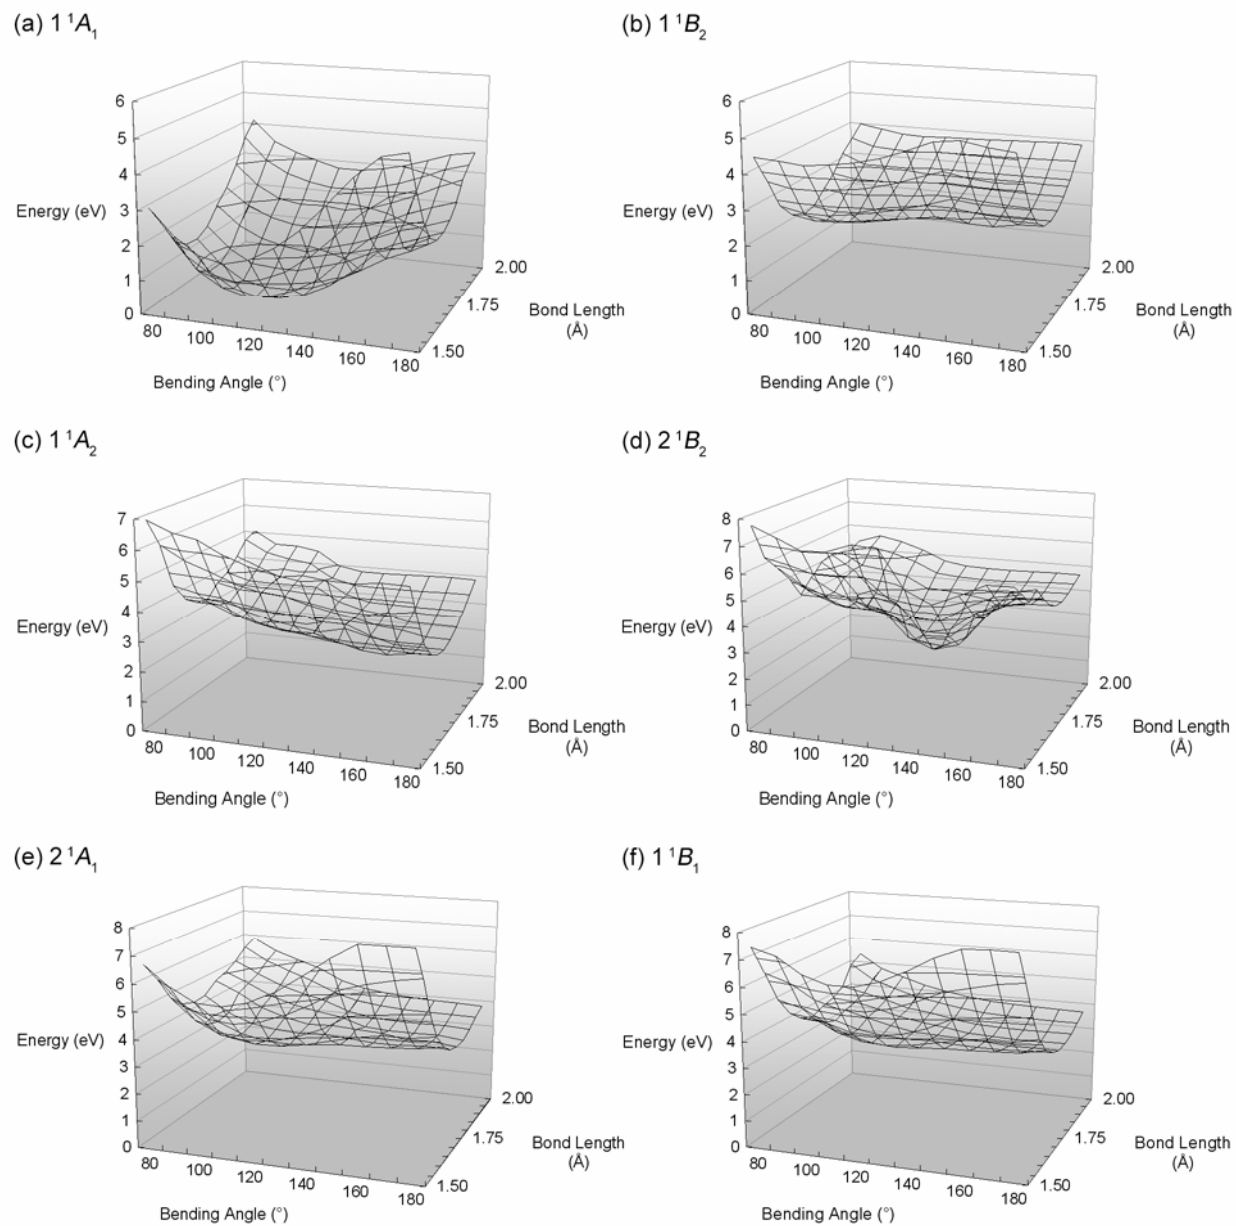

**Fig. S1** Two-dimensional multi-reference multi-state CASPT2(12,12)/aug-cc-pVTZ potential energy surface scan of low-lying singlet states of TiO<sub>2</sub>.

## References

- <sup>S1</sup> P. J. Hay and W. R. Wadt, *J. Chem. Phys.*, 1985, **82**, 270.
- <sup>S2</sup> G. V. Chertihin and L. Andrews, *J. Phys. Chem.*, 1995, **99**, 6356.
- <sup>S3</sup> S. Brünken, H. S. P. Muller, K. M. Menten, M. C. McCarthy and P. Thaddeus, *Astrophys. J.*, 2008, **676**, 1367.
- <sup>S4</sup> H. Wang, T. C. Steimle, C. Apetrei and J. P. Maier, *Phys. Chem. Chem. Phys.*, 2009, **11**, 2649.
- <sup>S5</sup> F. Grein, *J. Chem. Phys.*, 2007, **126**, 034313.
